# Supplementary material for: Effect of microwave hydrothermal pretreatment on dissolution of composite components in Acacia wood and subsequent pulping performance
Source: Research Square preprint supplement (doi:10.21203/rs.3.rs-5009853/v1), 2024-10-08
Supplement: Supplementary file 1 [file b5ae4b554fcdc70cf0348a0f.docx]

**Supporting Information**

**Effect of microwave hydrothermal pretreatment on dissolution of composite components in Acacia wood and subsequent pulping performance**

Wenfeng Ding1, Xingxiang Ji1, Zhongjian Tian1,2*, Shan Liu1, Fengshan Zhang2, Jingpeng Zhou2

1 State Key Laboratory of Biobased Material and Green Papermaking, Faculty of Light Industry, Qilu University of Technology (Shandong Academy of Sciences), Jinan 250353, China

2 Shandong Huatai Paper Co., Ltd. & Shandong Yellow Triangle Biotechnology Industry Research Institute Co. LTD, Dongying 257335, China

***Corresponding authors:**

E-mail addresses: tianzhj@qlu.edu.cn (Z. Tian)

**S1. Analysis Methods**

**S1.1 Wood chips yield analysis**

The yield of pretreated Acacia wood chips was calculated according to **Eq. 1**.

Where *m1* is the adiabatic mass of pretreated acacia wood chips (g); *m* is the adiabatic mass of raw acacia wood (g).

**S1.1 Hydrolysates compositions analysis**

The monosaccharide content of the hydrolysate was filtered and diluted 200 times with ultrapure water, and then analyzed by ion chromatography. Data were processed according to **Eq. 2**, and the final result was the average of the determination of parallel samples.

Where *CM* is the concentration of monosaccharides (g/L); *cx* is the concentration of a component, measured in ion chromatography or liquid chromatography, expressed in milligrams per liter (mg/L); *D* is the dilution factor of the pretreatment solution

Take 1 mL of the pretreatment solution and place it into a digestion tube. Add a certain volume of 98% H2SO4 to create an environment with a mass fraction of 4% sulfuric acid in the pretreatment solution. Then, place the digestion tube into a digestion apparatus and digest at 121°C for 60 minutes. The increased monosaccharide concentration after hydrolysis is considered to be the oligosaccharide concentration, as shown **in Eq. 3**. The final result is the average value of the measurements from parallel samples.

Where *CO* is the concentration of the polysaccharides (g/L); *K* is the correction coefficient; *A* is the conversion ratio of polysaccharides.

**S2. Computational process for model building**

The first step is to determine the appropriate regression equation and set the regression equation as Eq. 1

Where is temperature,is time, and are coefficients to be determined.

The error *vi* [[50](#_ENREF_50)] is the difference between the experimental data *yi*and the theoretical value *Yi*

Assuming that there are now *n* samples, the following system of equations is obtained by bringing the sample points obtained from all the experimental data into **Eq. (5)**:

**Eq. (6)** was rewritten as **Eq. (7)** using matrix form:

Among them: , , ,

Where ***V*** is the residual matrix, ***L*** is the measured matrix, ***A*** is the estimated value matrix, and ***X*** is the coefficient matrix.

The best fit line is determined by minimizing the sum of squared errors *S*, which reduces the deviation between the theoretical values and the actual data. To minimize *S*, we set the first derivative of the sum of squared errors with respect to the undetermined coefficients to zero. This yields **Eq. (8)** and **Eq. (9)**, respectively.

The system of **Eq. (9)** is rewritten as **Eq (10)** using the matrix form:

Bring **Eq. (7)** into **Eq. (10)** and tidy up to get **Eq. (11)**

Bring the data into **Eq. (11)** and further sort out the nonlinear equation, as shown in **Eq. (12)**:

**S2. Validation of the model**

To validate the nonlinear least squares model, performance was evaluated using the mean square error (MSE) and the coefficient of determination (R²). These functions are defined in **Eq. (13)** and **Eq. (14)**, respectively.

Where *m* is the number of samples; is the actual value of the sample; is the predicted value of the sample; *RSS* is the residual sum of squares; *TSS* is the total sum of squares.

The F-test is used to measure the degree of significance of the regression equation as in **Eq. 15**.

Where *U* is the regressive sum of squares, *Q* is the residual sum of squares.

**S3. Validation of the model**


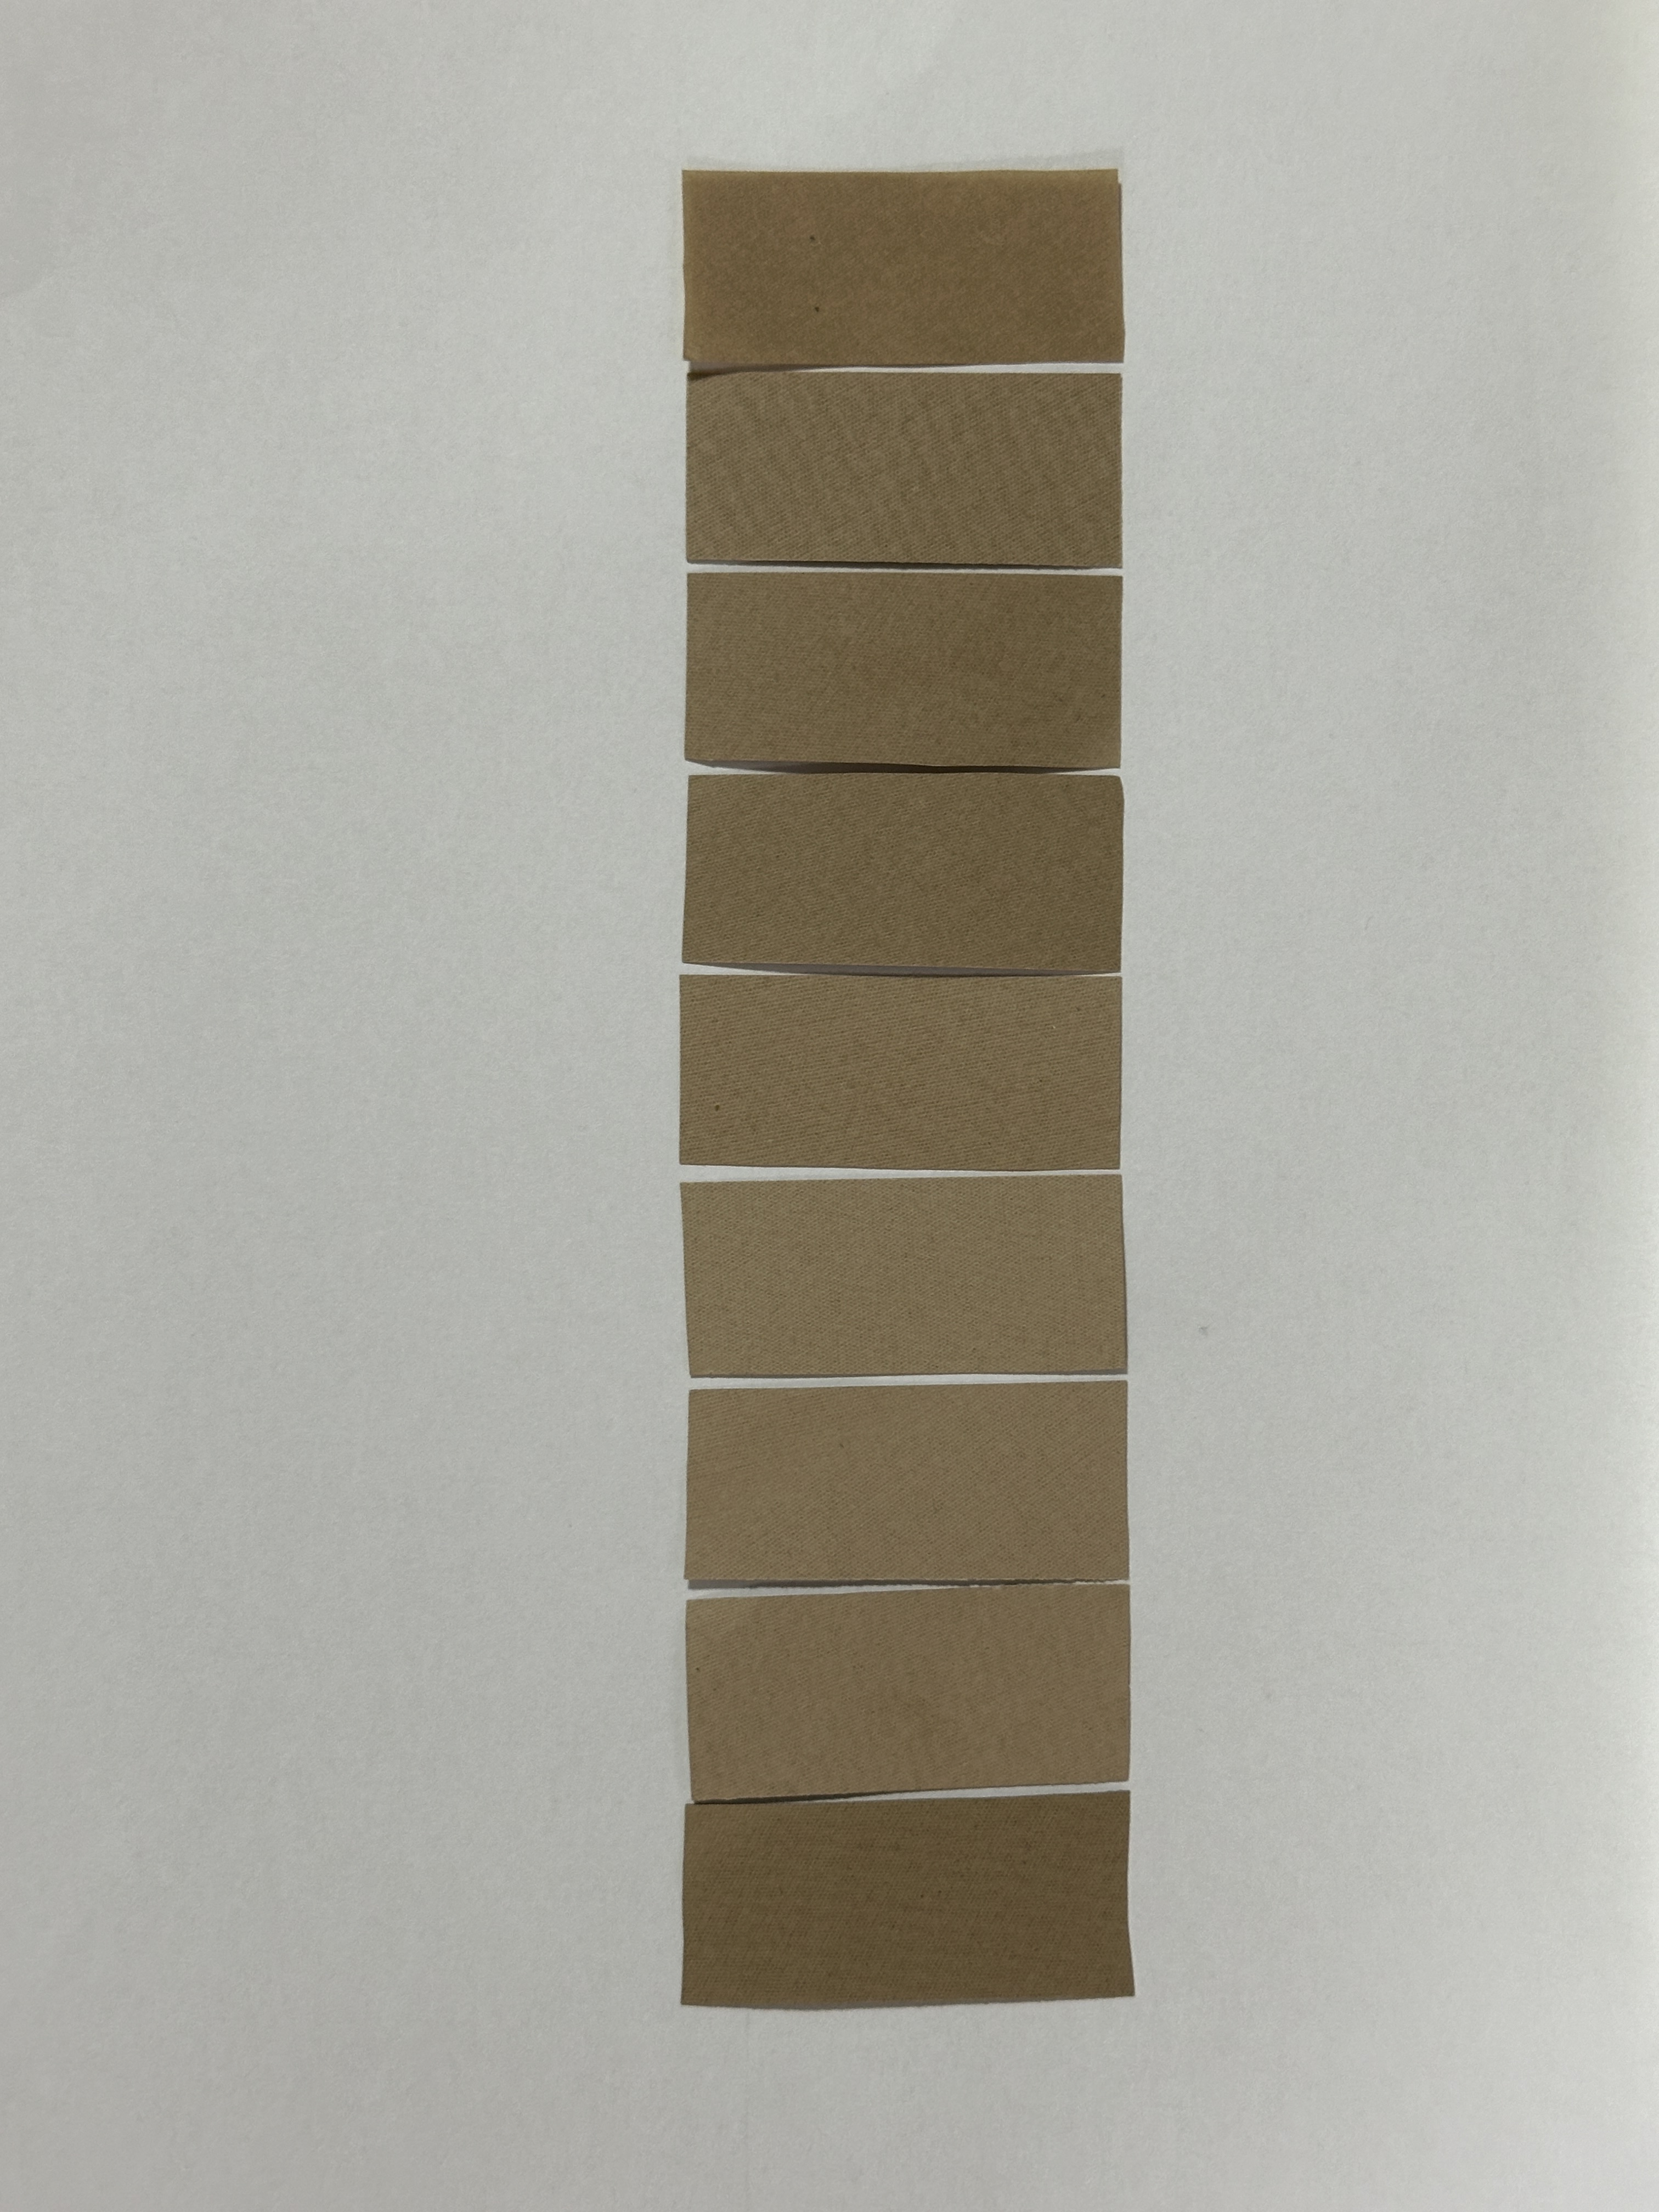


**Fig. S1** Pictures of paper at different processing temperatures. Note From left to right the pre-treatment conditions are, in order, acacia wood raw material, T120t60, T130t60, T140t60, T150t60, T160t60 T170t60, T180t60, T190t60.


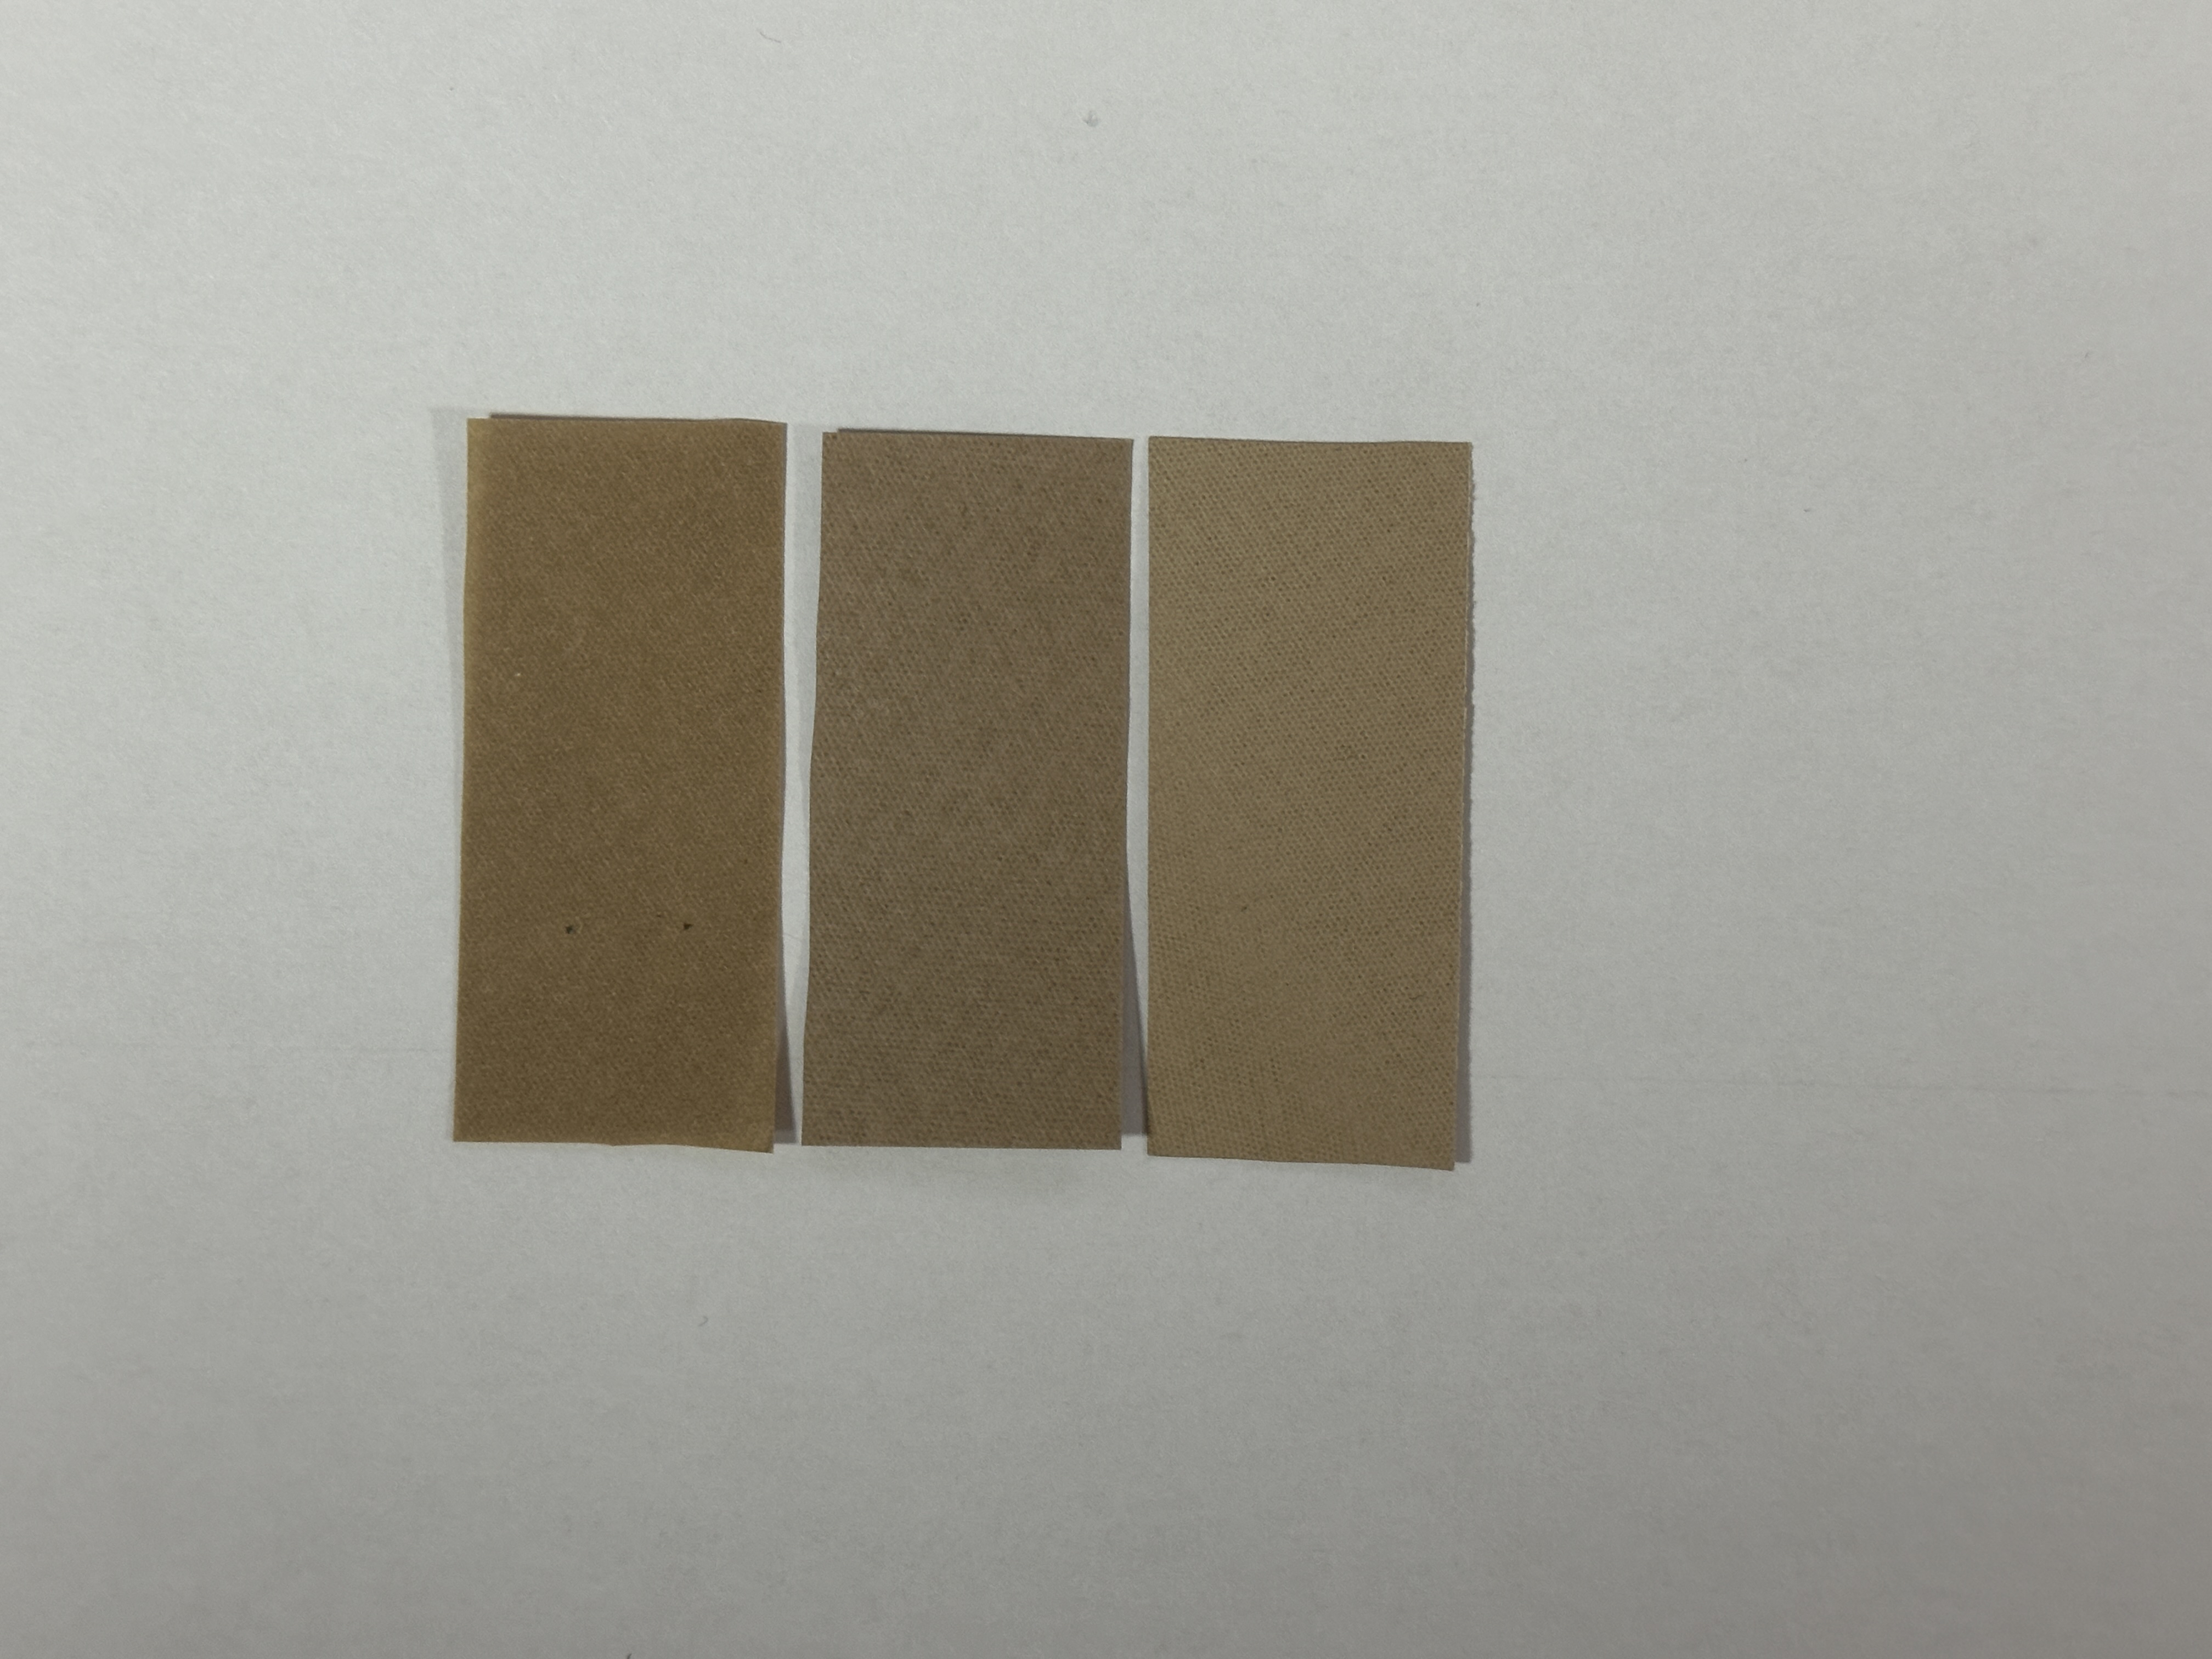


**Fig. S2** Pictures of paper after different pretreatments. From left to right are untreated paper, conventional hydrothermal pre-treated paper, microwave hydrothermal pre-treated paper.
